# Supplementary material for: Neutrophils prevent rectal bleeding in ulcerative colitis by peptidyl-arginine deiminase-4-dependent immunothrombosis
Source: HighWire-hosted journal article supplement (doi:10.1136/gutjnl-2021-324725), 2021-12-03
Supplement: gutjnl-2021-324725supp002_data_supplement.pdf [file gutjnl-2021-324725supp002_data_supplement.pdf]

| <b>Clinical Features of study cohort<br/>Active Ulcerative Colitis</b> |                      |              |
|------------------------------------------------------------------------|----------------------|--------------|
| N                                                                      |                      | 36           |
| Age<br>[mean (range)]                                                  |                      | 45.9 (19-78) |
| Male / Female [%]                                                      |                      | 41.4         |
| Localization [%]                                                       | Proctitis            | 13.2         |
|                                                                        | Proctosigmoiditis    | 34.2         |
|                                                                        | Left- sided colitis  | 18.4         |
|                                                                        | Pancolitis           | 34.2         |
| Partial Mayo Score<br>(rectal bleeding)                                | 0                    | 36.1         |
|                                                                        | 1                    | 38.9         |
|                                                                        | 2-3                  | 25           |
| Past or current<br>therapies reported<br>[%]                           | Aminosalicylates     | 66.7         |
|                                                                        | Steroids             | 86.1         |
|                                                                        | Thioguanines         | 33.3         |
|                                                                        | cyclosporine         | 11.1         |
|                                                                        | Vedolizumab          | 88.9         |
|                                                                        | Anti- TNF antibodies | 44.4         |

| <b>IBD treatment</b>       | <b>% of cohort</b> | <b>Improvement in rectal bleeding score</b> |                    |
|----------------------------|--------------------|---------------------------------------------|--------------------|
|                            |                    | <b>day 3 to 6</b>                           | <b>day 7 to 12</b> |
|                            |                    | <b>% of cohort</b>                          | <b>% of cohort</b> |
| Steroids                   | 100 (13/13)        | 54 (7/13)                                   | 92 (12/13)         |
| Ciclosporin                | 38 (5/13)          | 4 (2/5)                                     | 100 (5/5)          |
| Infliximab                 | 15 (2/13)          | 5 (1/2)                                     | 100 (2/2)          |
| <b>Concomitant therapy</b> |                    |                                             |                    |
| Ganciclovir                | 15 (2/13)          | 5 (1/2)                                     | 100 (2/2)          |
| Heparin (prophylactic)     | 77 (10/13)         | 56 (5/9)                                    | 90 (9/10)          |
| No Heparin                 | 23 (3/13)          | 66 (2/3)                                    | 100 (3/3)          |

**Supplementary Table 1:**

The patient characteristics of the study cohort (N: 36) are depicted including age and sex distribution, localisation and extent of disease, partial Mayo score regarding rectal bleeding, as well as previous and current therapeutics used.

**Supplementary Table 2:**

Whenever available from clinical documentation, the relation of the improvement in rectal bleeding over time to IBD-related (steroids, ciclosporin, infliximab) and concomitant therapies (ganciclovir, heparin, no heparin) is reported.
